# Supplementary material for: Cysteine synthases CYSL-1 and CYSL-2 mediate C. elegans heritable adaptation to P. vranovensis infection
Source: Nat Commun. 2020 Apr 8;11:1741. doi: 10.1038/s41467-020-15555-8 (PMC7142082; doi:10.1038/s41467-020-15555-8)
Supplement: Supplementary file 1 — Supplementary Information [file 41467_2020_15555_MOESM1_ESM.pdf]

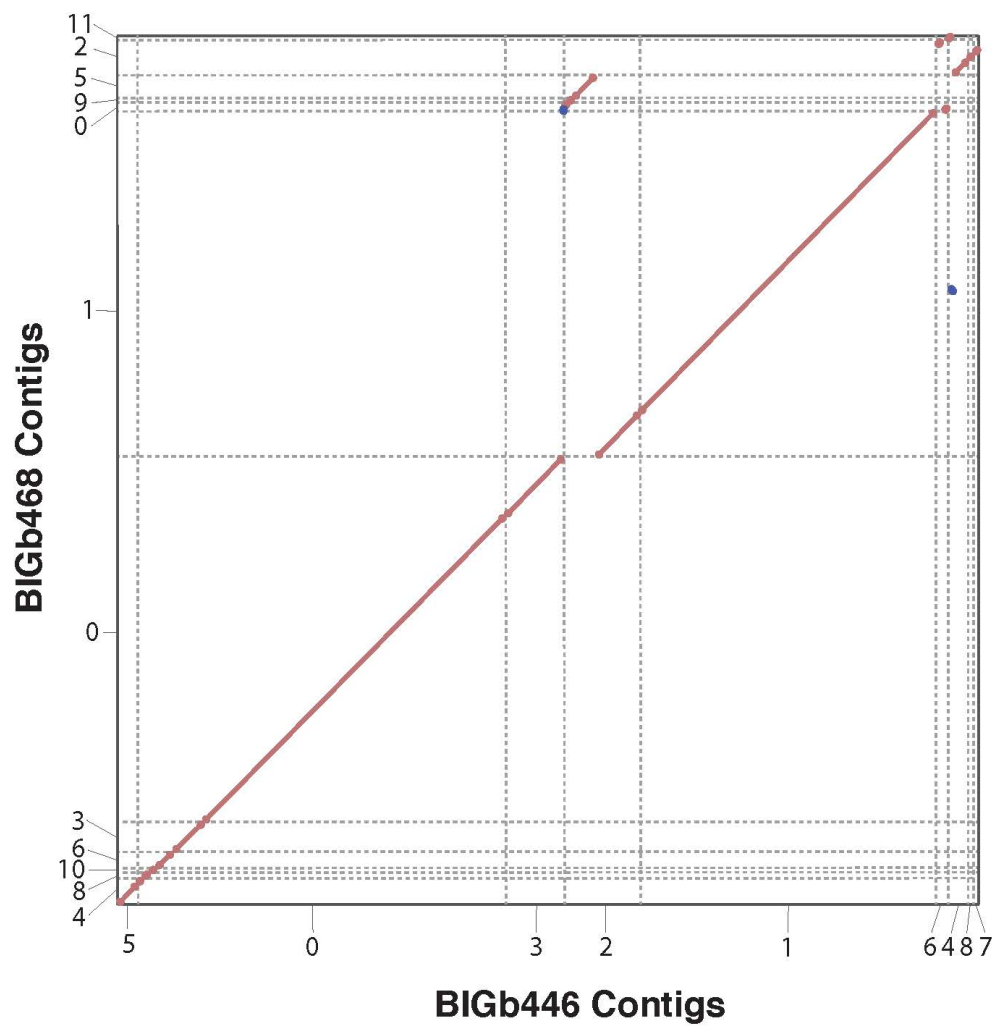

Supplementary Figure 1. BIGb446 and BIGb468 are isolates of a single species. MUMmer plot of the alignments of contigs of BIGb446 and BIGb468 assembled genomes.

**a**

| Fertilization                           | Maternal Diet | Paternal Diet | Alive | Dead |
|-----------------------------------------|---------------|---------------|-------|------|
| Self-fertilized on carbenicillin plates | HB101         | HB101         | 2     | 119  |
| Self-fertilized on carbenicillin plates | BIGb446       | BIGb446       | 1     | 91   |
| Mated on carbenicillin plates           | HB101         | BIGb446       | 1     | 137  |

**b**

| Parental Diet | Alive | Dead |
|---------------|-------|------|
| HB101         | 3     | 97   |
| BIGb446       | 32    | 68   |

**c**

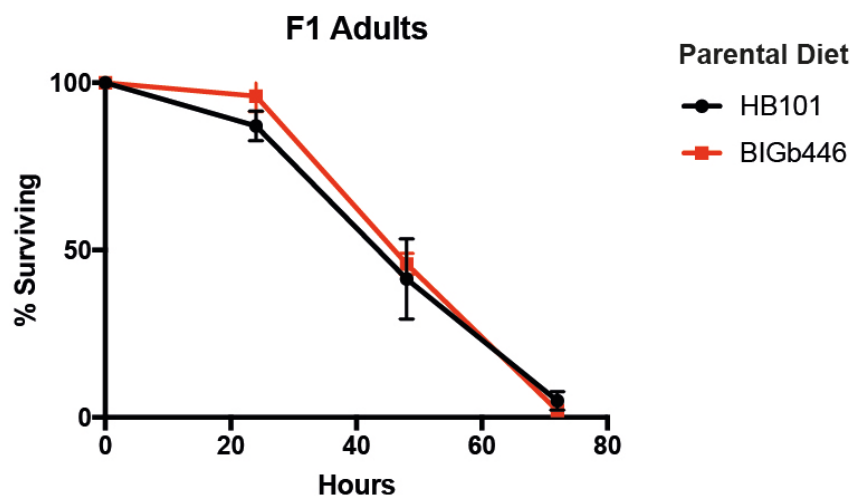

Supplementary Figure 2. Eliminating infection by *P. vranovensis* results in a loss of adaptation. (a) Infected and uninfected male and hermaphrodite wild-type adults were placed onto plates containing carbenicillin for 24 hours. Embryos were transferred to fresh plates seeded with *P. vranovensis* BIGb446 and were assayed for survival after 24 hours. (b) 3-fold stage embryos from parents fed *E. coli* HB101 or *P. vranovensis* BIGb446 for 24 hours were transferred to fresh plates seeded with *P. vranovensis* BIGb446. Survival was assayed after

24 hours. (c) Survival of F1 adults from parents fed a control diet of *E. coli* HB101 or exposed to *P. vranovensis* BIGb446 for 24 hours. F1 larvae developed on plates seeded with *E. coli* HB101. Data presented as mean values  $\pm$  s.d. n = 3 experiments of >100 animals.

Source data are provided as a Source Data file.

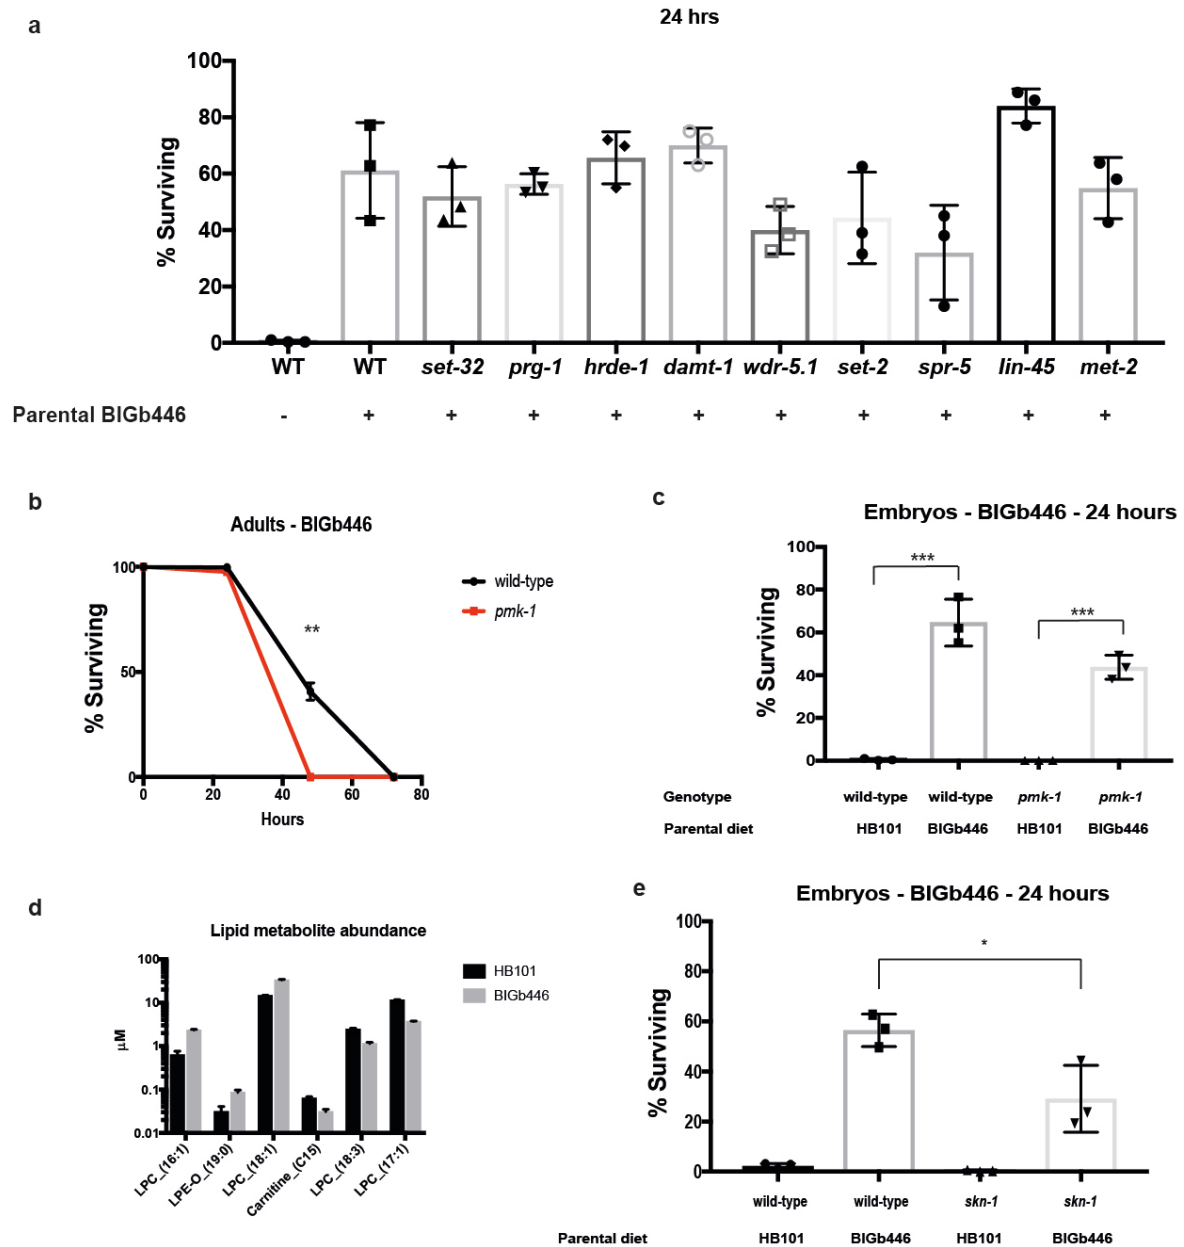

Supplementary Figure 3. Adaptation to *P. vranovenis* does not require factors previously reported to be required for multigenerational effects in *C. elegans*. (a) Percent of wild-type, *set-32(ok1457)*, *prg-1(n4357)*, *hrde-1(tm1200)*, *damt-1(gk961032)*, *wdr-5.1(ok1417)*, *set-2(ok952)*, *spr-5(by134)*, *lin-45(n2018)*, and *met-2(n4256)* mutants surviving on plates seeded with bacterial isolates BIGb446 after 24 hrs. Data presented as mean values  $\pm$  s.d.  $n = 3$  experiments of  $>100$  animals. (b) Percent of wild-type and *pmk-1(km25)* mutant adults surviving on NGM plates seeded with *P. vranovenis* BIGb446. Data presented as mean

values +/- s.d. n = 3 replicates of 100 animals. (c) Percent of wild-type and *pmk-1(km25)* mutants surviving on plates seeded with bacterial isolate BIGb446 after 24 hrs. Data presented as mean values +/- s.d. n = 3 experiments of >100 animals. \*\*\* =  $p < 0.001$ , \*\*\*\*  $p < 0.0001$  (d)  $\mu\text{M}$  abundance of lipid metabolites exhibiting a greater than 2-fold change in abundance in embryos from parents fed *P. vranovensis* BIGb446 when compared to embryos from parents fed *E. coli* HB101. Data presented as mean values +/- s.d. n = 3 replicates. (e) Percent of wild-type and *skn-1(zj15)* mutants surviving on plates seeded with *P. vranovensis* BIGb446 after 24 hrs. Data presented as mean values +/- s.d. n = 3 experiments of >100 animals. Source data are provided as a Source Data file. \* =  $p < 0.05$ , \*\* =  $p < 0.01$ , \*\*\* =  $p < 0.001$ . See statistics and reproducibility section for statistical tests run.

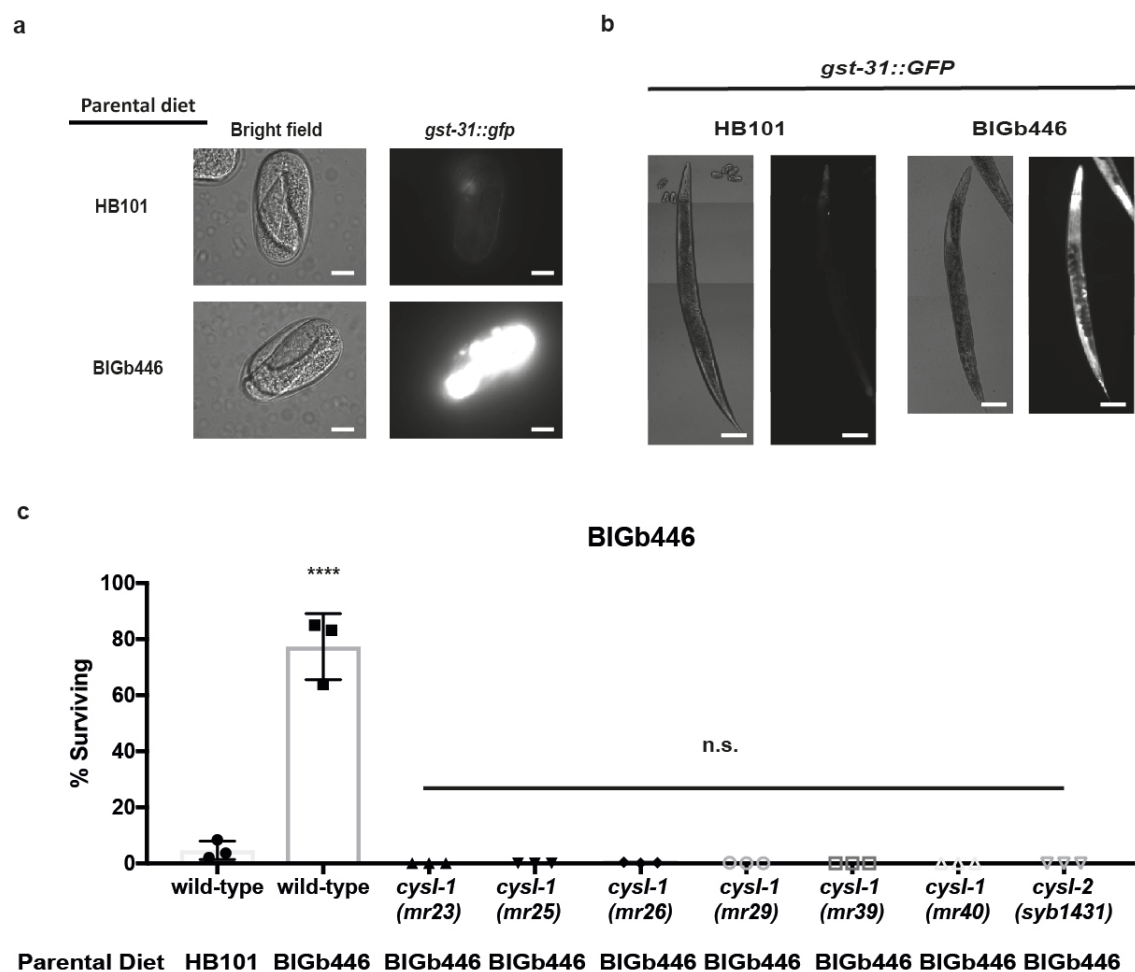

Supplementary Figure 4. Parental exposure to *P. vranovensis* both alters progeny gene expression and promotes progeny adaptation to *P. vranovensis* via a mechanism that requires CYSL-1 and CYSL-2. (a) Representative images of *gst-31::GFP* in 3-fold stage embryos from parents either fed *E. coli* HB101 or exposed to *P. vranovensis* BIGb446. Scale bars 10  $\mu$ m. (b) Representative images of *gst-31::GFP* in adult animals fed *E. coli* HB101 or exposed to *P. vranovensis* BIGb446. Scale bars 100  $\mu$ m. (c) Percent of wild-type and *cysl-1*(*mr23*, *mr25*, *mr26*, *mr29*, *mr39*, *mr40*) and *cysl-2*(*syb1431*) mutants surviving on plates seeded with bacterial isolates BIGb446 after 24 hrs. Data presented as mean values  $\pm$  s.d. n = 3 experiments of >100 animals. \*\*\*\* p < 0.0001. Source data are provided as a Source Data file.

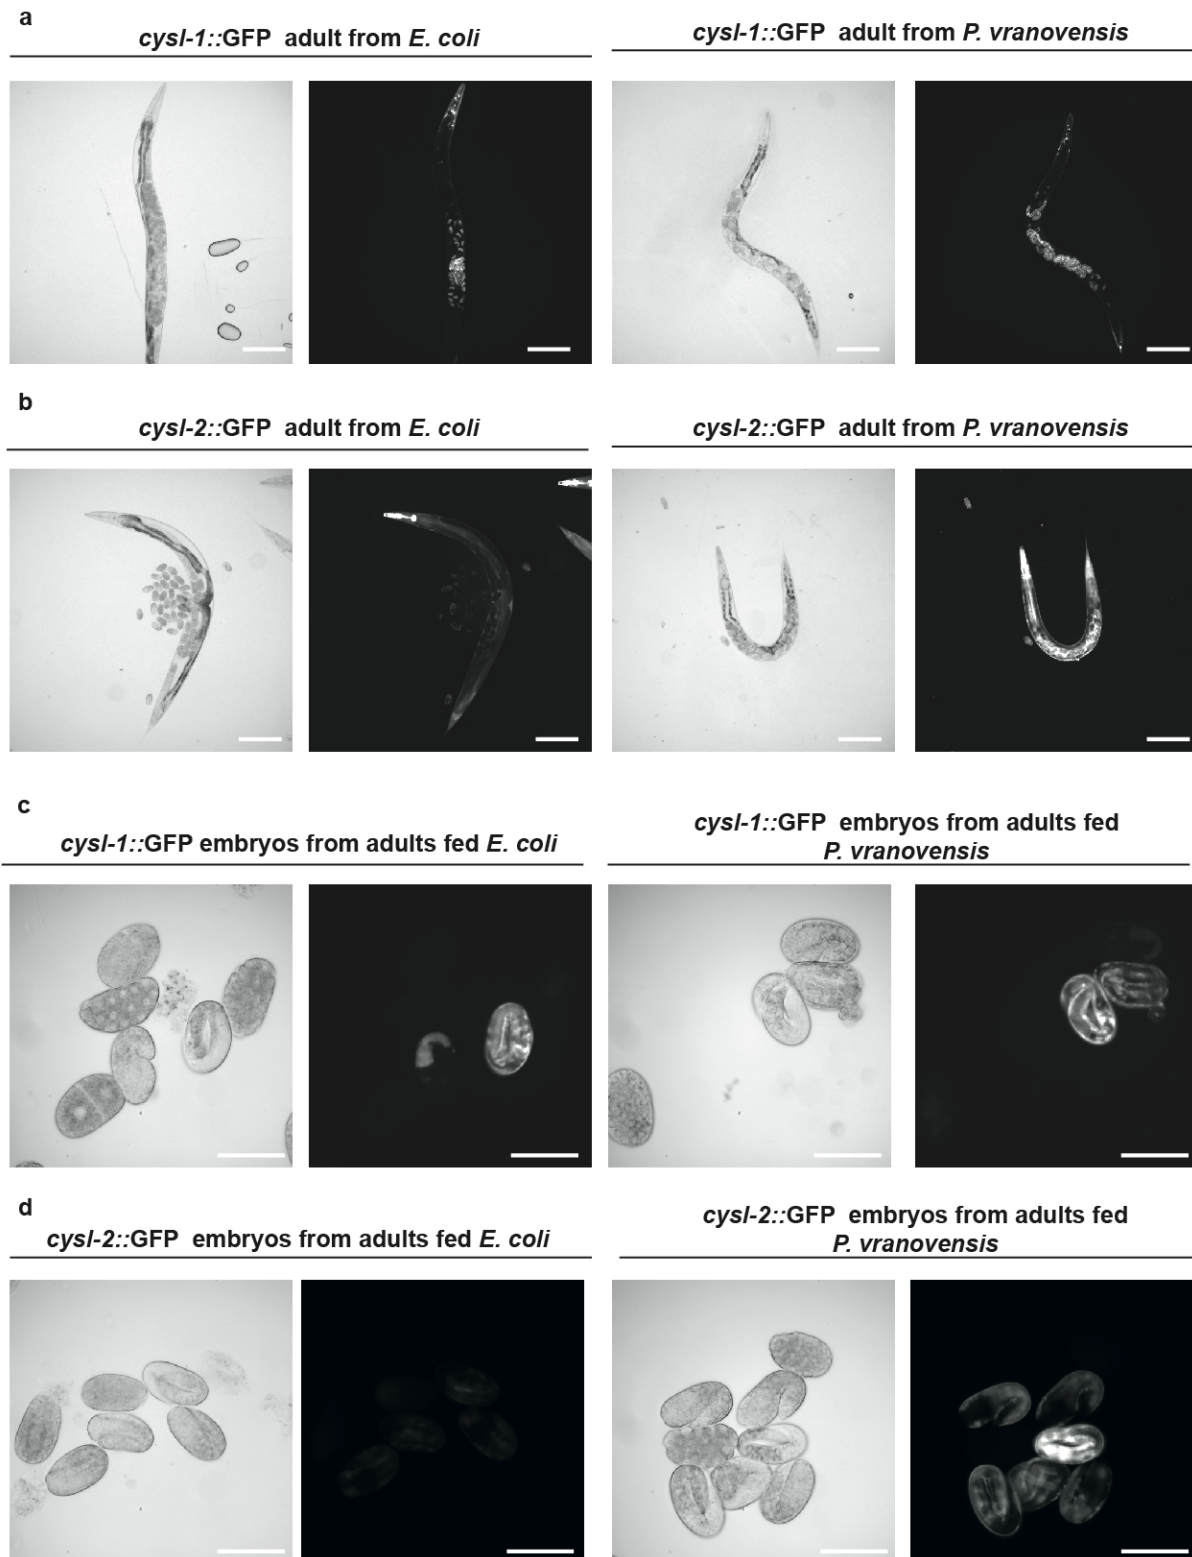

Supplementary Figure 5. *P. vranovensis* infection promotes *cysl-2::GFP* expression in adults and F1 embryos. (a) Representative images of *cysl-1::GFP* in adult animals fed *E. coli* HB101 or exposed to *P. vranovensis* BIGb446. Scale bars 200  $\mu$ m. (b) Representative images of *cysl-2::GFP* in adult animals fed *E. coli* HB101 or exposed to *P. vranovensis* BIGb446.

Scale bars 200  $\mu\text{m}$ . (c) Representative images of *cysl-1::GFP* in F1 embryos from parents fed *E. coli* HB101 or exposed to *P. vranovensis* BIGb446. Scale bars 50  $\mu\text{m}$ . (d) Representative images of *cysl-2::GFP* in F1 embryos from parents fed *E. coli* HB101 or exposed to *P. vranovensis* BIGb446. Scale bars 50  $\mu\text{m}$ . All experiments repeated three times with similar results.

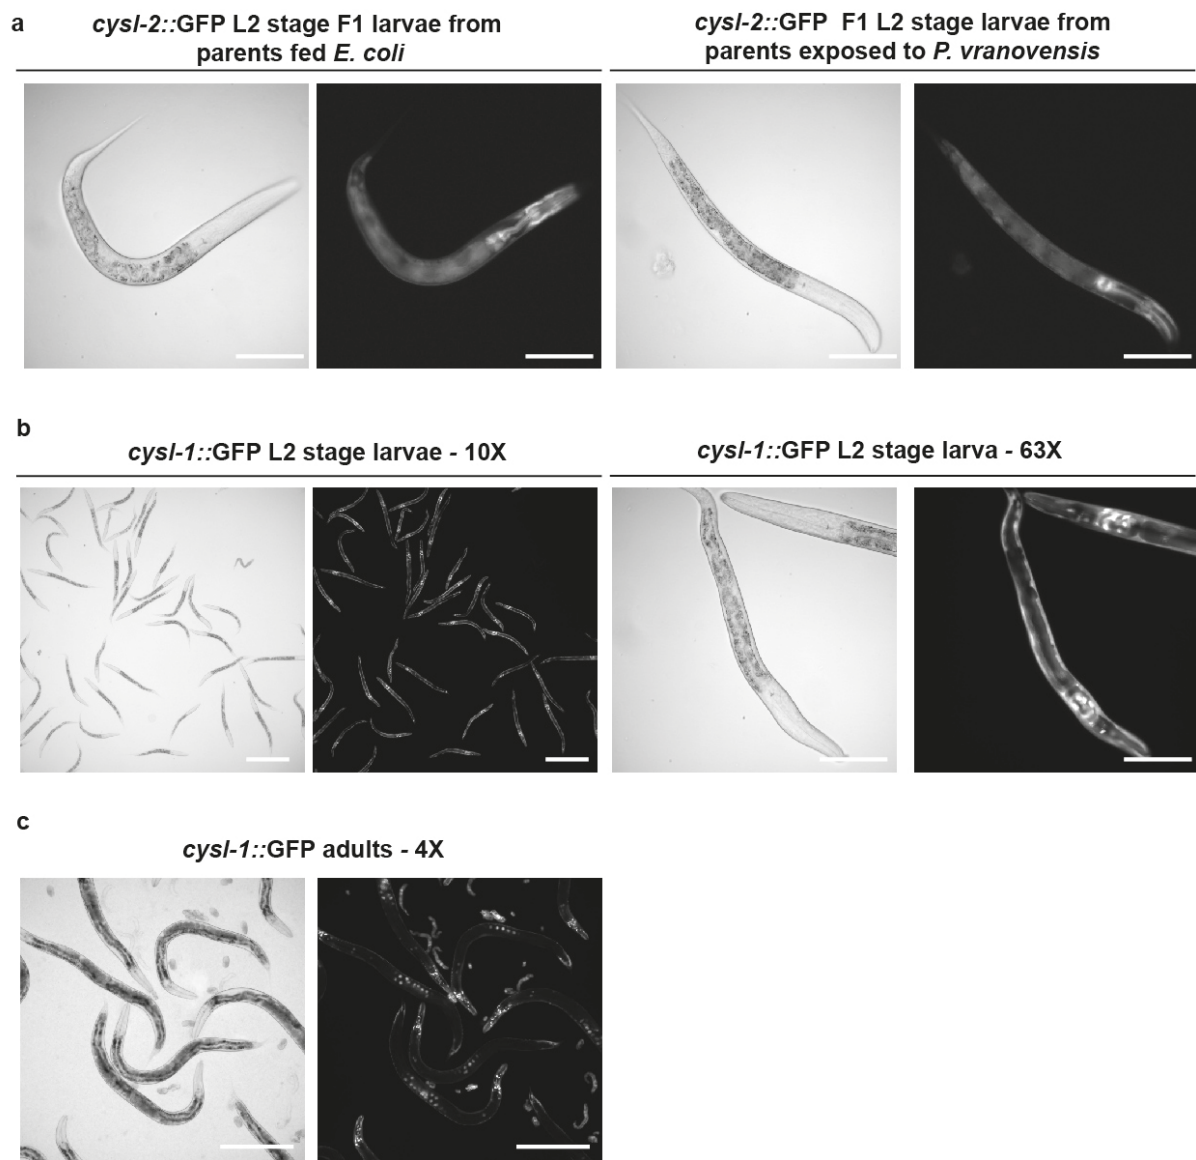

Supplementary Figure 6. *P. vranovensis* infection alters gene expression in *C. elegans*. (a) Representative images of *cysl-2::GFP* in F1 offspring growing on *E. coli* HB101. Parents of F1 offspring fed either *E. coli* HB101 or exposed to *P. vranovensis* BIGb446. Scale bars 50  $\mu\text{m}$ . (b) Representative 10X and 63X images of L2-stage animals expressing *cysl-1::GFP*. Animals fed *E. coli* HB101. Scale bars 200  $\mu\text{m}$  for 10X and 50  $\mu\text{m}$  for 63X. (c) Representative 4X image of adult animals expressing *cysl-1::GFP*. Animals were fed *E. coli* HB101. Scale bars 500  $\mu\text{m}$ . All experiments repeated three times with similar results.
